# Supplementary material for: Bacterial and Fungal Dynamics During the Fermentation Process of Sesotho, a Traditional Beer of Southern Africa
Source: PubMed Central journal article supplement (PMC7339052; doi:10.3389/fmicb.2020.01451), 2020-06-30

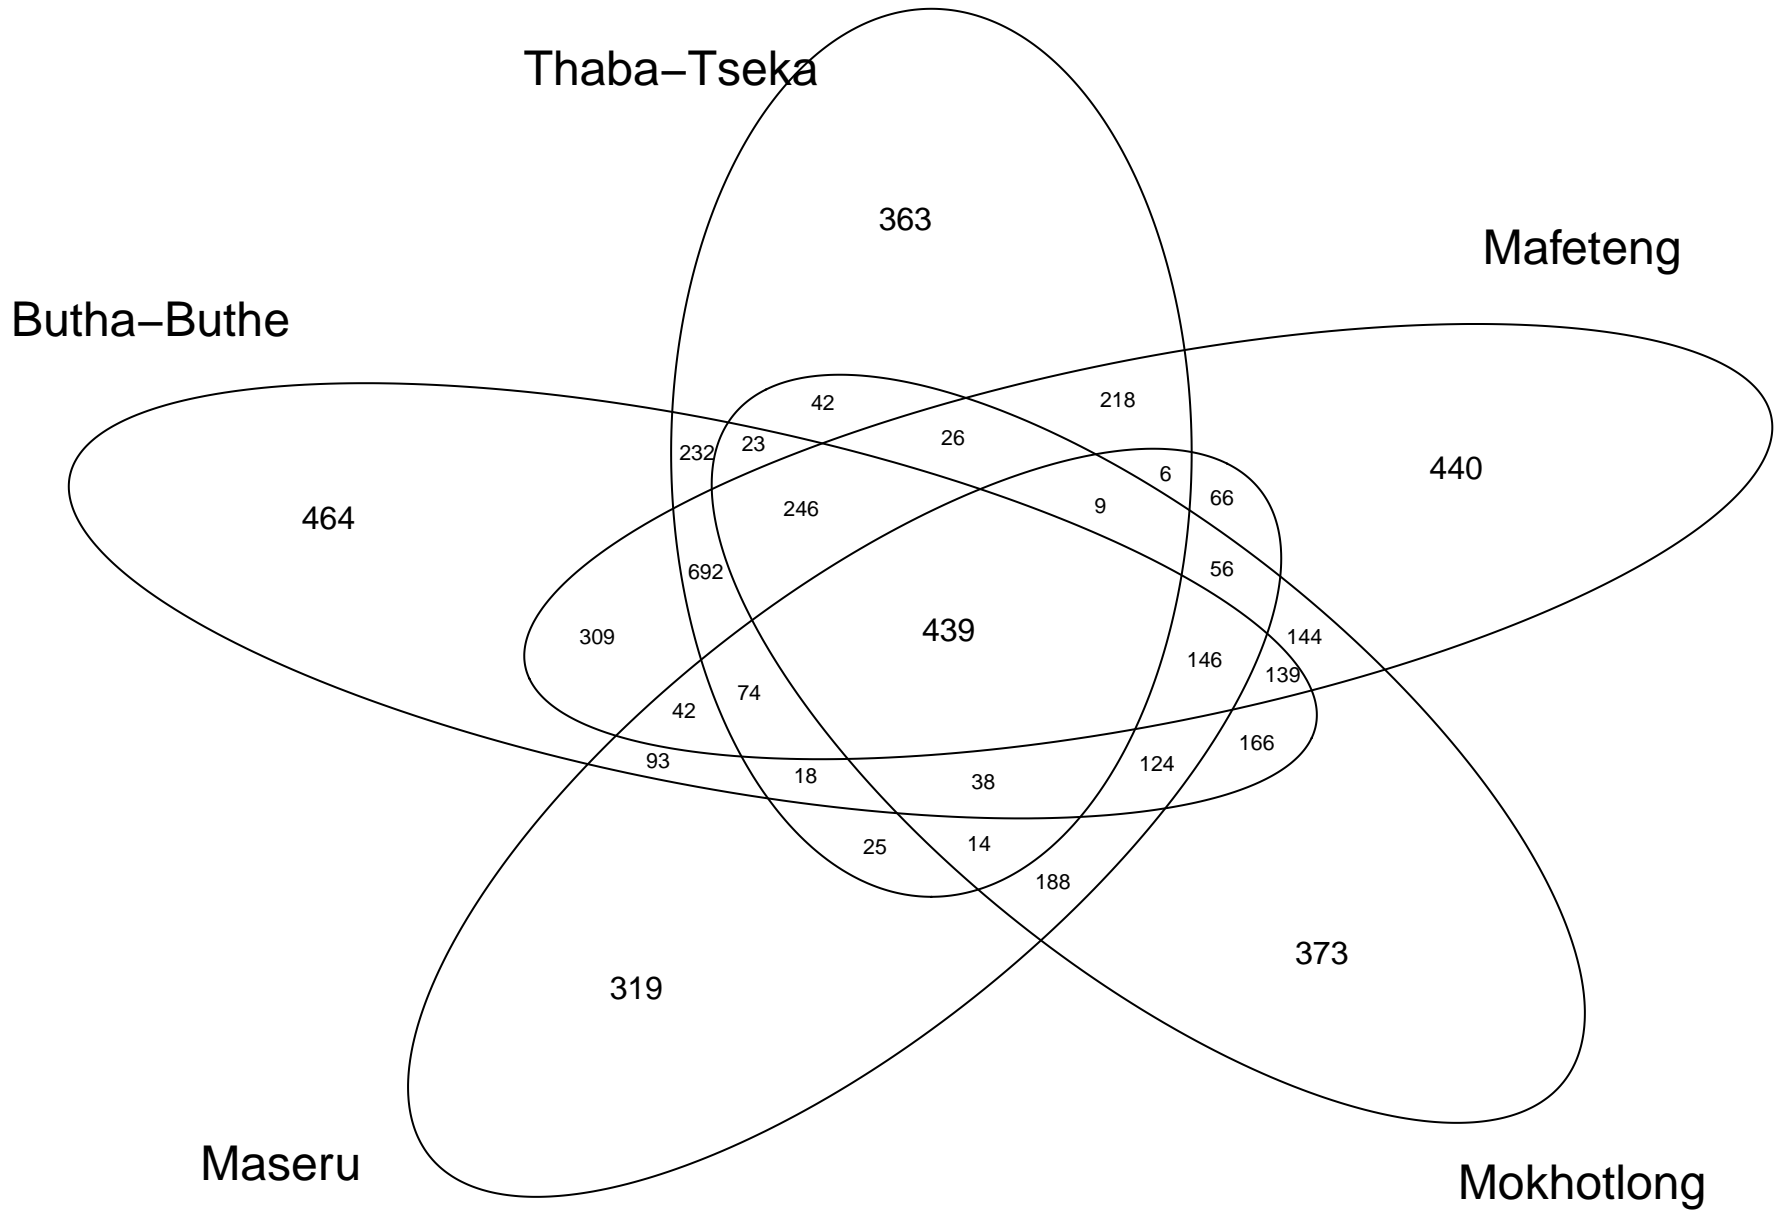

Supplement: Image_4.pdf [file Image_4.pdf]
